# Supplementary material
Source: Copernicus journal article supplement (doi:10.5194/egusphere-2026-3619)
Supplement: Supplementary file 1 [file egusphere-2026-3619-supplement.pdf]

## Stratospheric Chlorine monoxide from Apr-Dec 2023

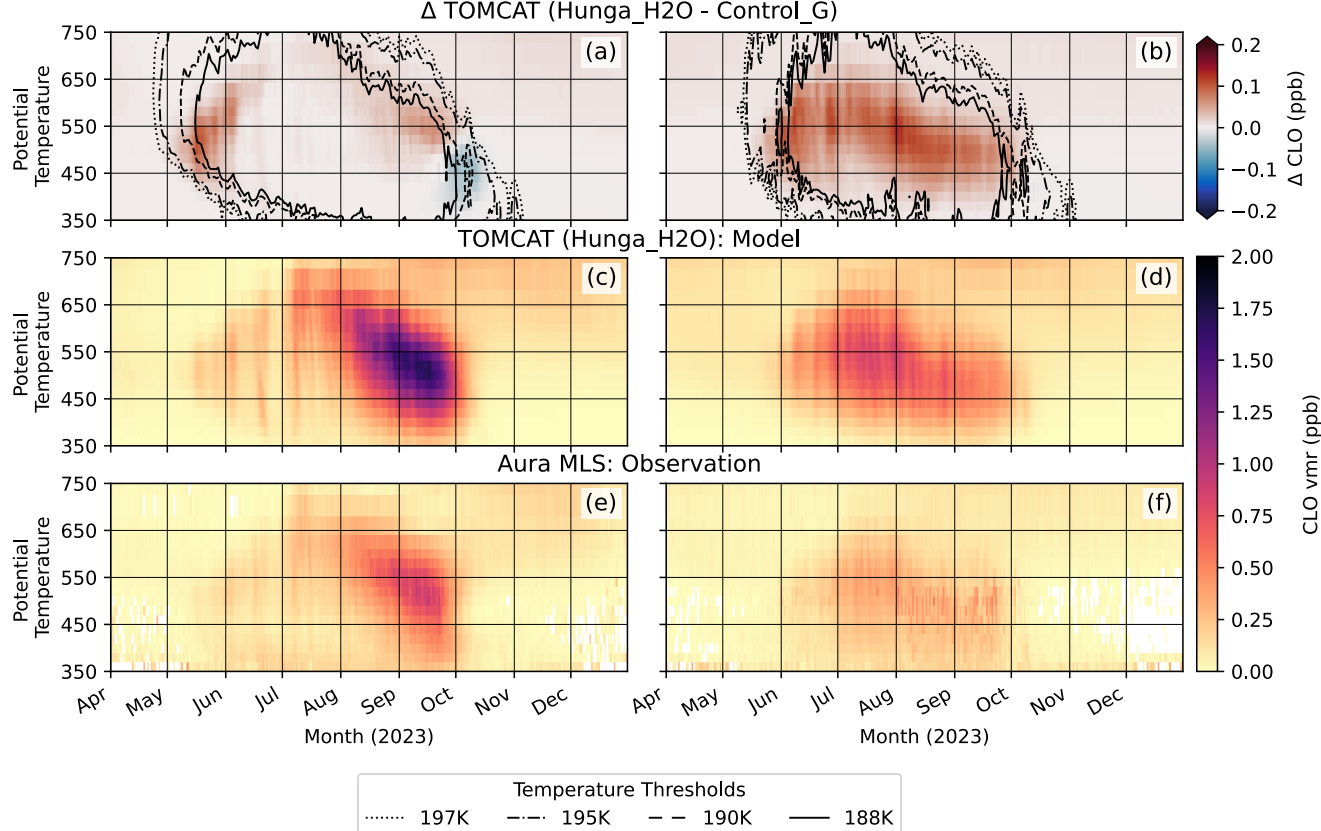

**Figure S1.** Chlorine monoxide (ClO) differences ( $\Delta$ ClO) and volume mixing ratios (vmr) in parts per billions (ppb) from 1st April to December 31st 2023. Panels (a) & (b) show the  $\Delta$  ClO from Hunga\_H2O (with H<sub>2</sub>O injection) – Control\_G (without injection) overlaid with contours indicating the PSC threshold temperatures for NAT (195 K) and ice (188 K) as solid lines. Dashed lines mark the threshold temperatures +2 K. Panels (c) & (d) are the modelled ClO from Hunga\_H2O as an area-weighted mean. Panels (e) & (f) show the MLS observations. Panels (b)-(e) use the same colour scale. The left panels are for the core region ( $-90^\circ$  to  $-70^\circ$ EL) and right is the edge ( $-70^\circ$  to  $-55^\circ$  EL).

## Stratospheric Hydrogen chloride from Apr-Dec 2023

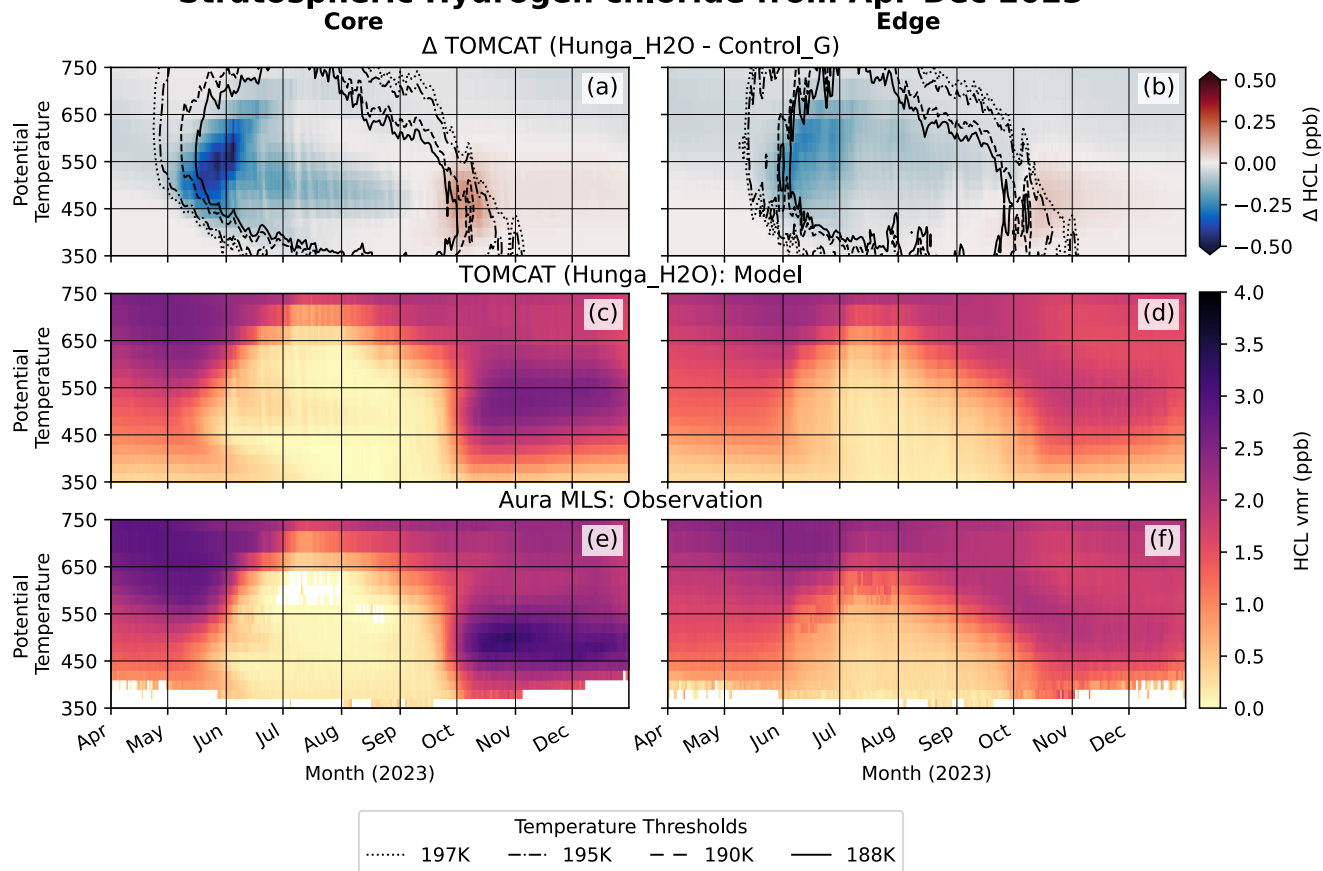

**Figure S2.** Same as Figure S1 but for hydrochloric acid (HCl).

## PSC Area on selected levels for 2023

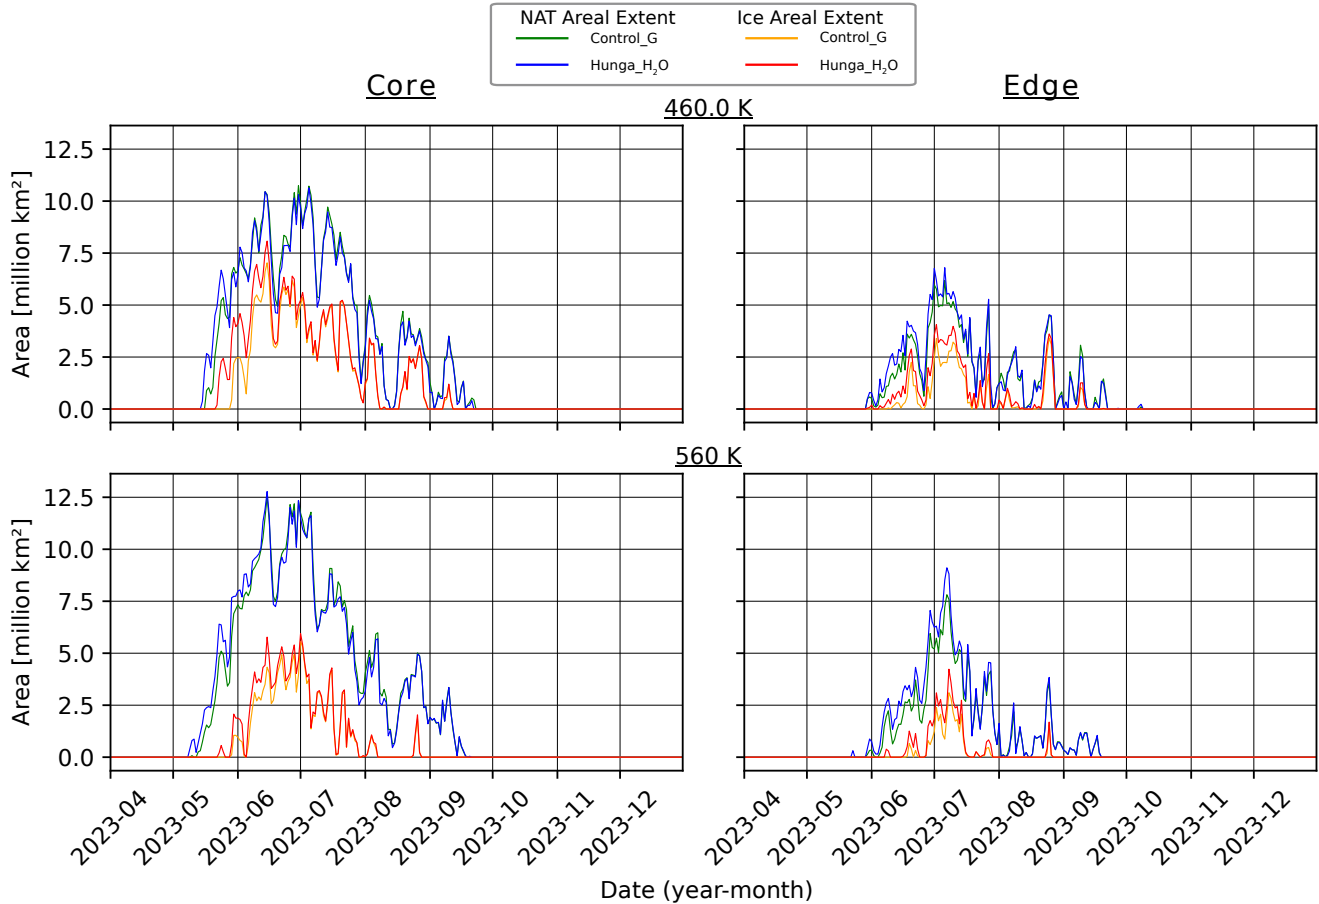

**Figure S3.** Antarctic vortex season (April-December) 2023 areal extent of NAT and ice PSCs (million km<sup>2</sup>) at 460 K (top) and 560 K (bottom) level from model runs Hunga\_H2O and Control\_G for the core (left),  $-90^{\circ}$  to  $-70^{\circ}$ EL, and edge,  $-70^{\circ}$  to  $-55^{\circ}$  EL, (right) regions.

## PSC Area on selected levels

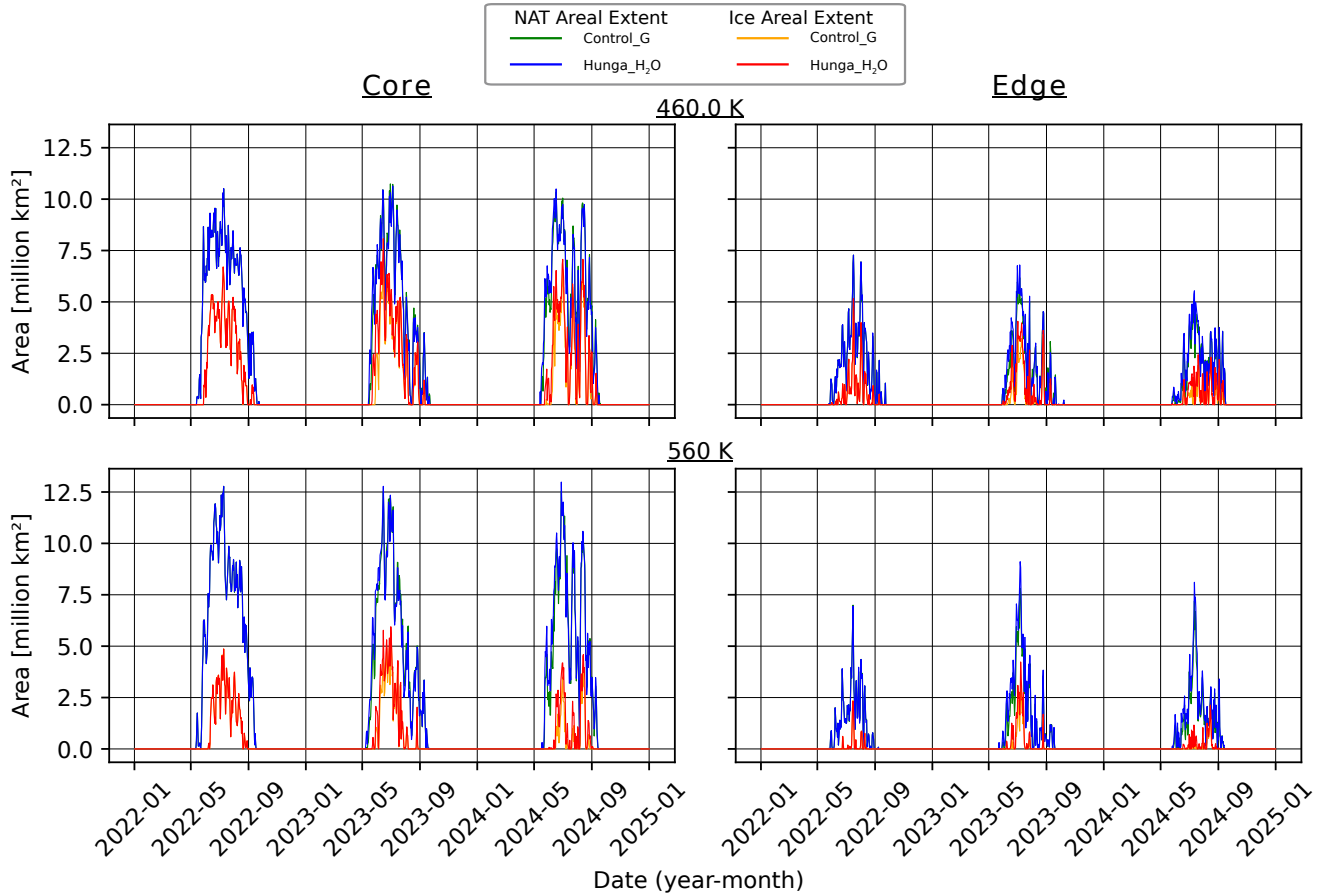

**Figure S4.** Antarctic post-Hunga (2022-2025) areal extent of NAT and ice PSCs (million km<sup>2</sup>) at 460 K (top) and 560 K (bottom) level from model runs Hunga\_H<sub>2</sub>O and Control\_G for the core (left), -90° to -70°EL, and edge, -70° to -55° EL, (right) regions.

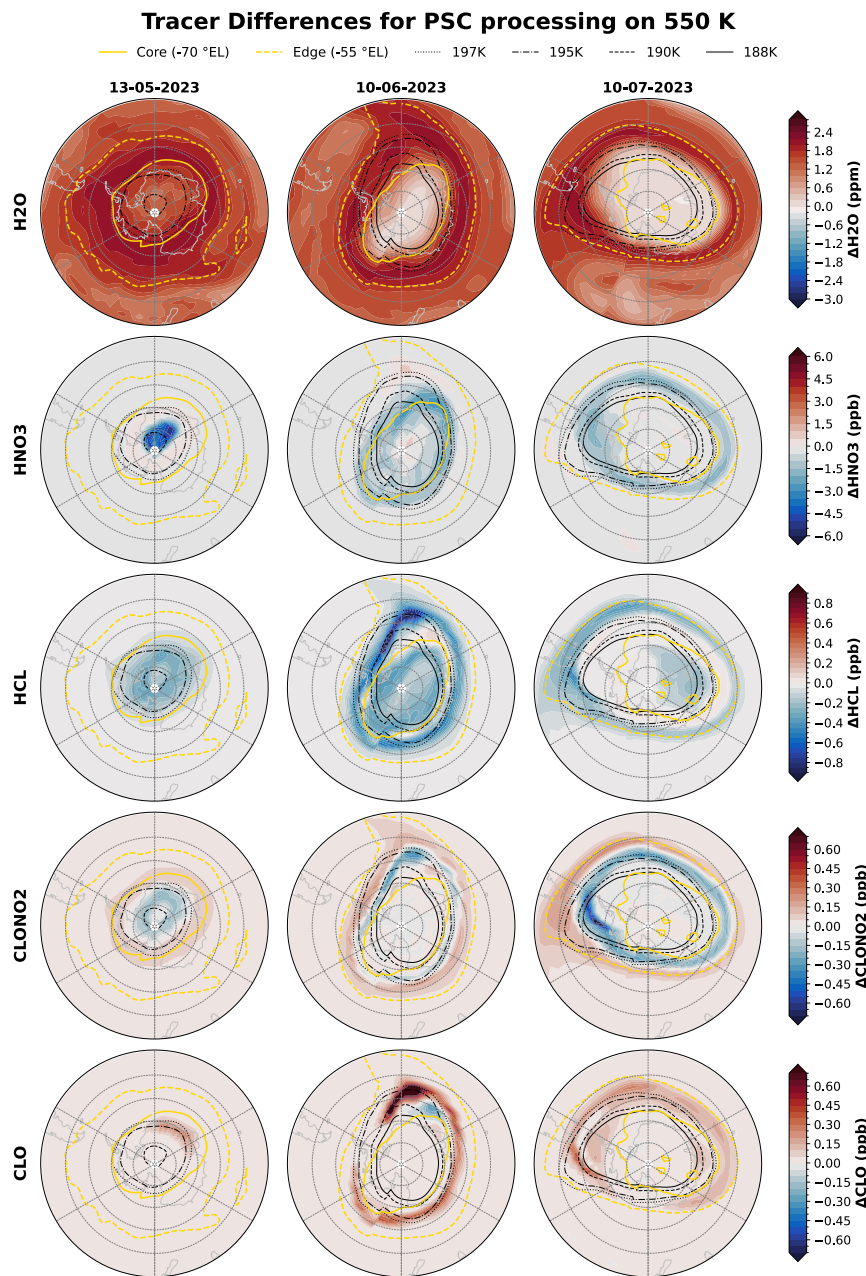

**Figure S5.** Antarctic polar projections of modelled H<sub>2</sub>O, HNO<sub>3</sub>, HCl, ClONO<sub>2</sub> and ClO on the 550 K level for 3 days (13.05.23, 10.06.23, 10.07.23) to show the evolution of the PSC chemical processing. Core (−90° to −70°EL) and edge (−70° to −55° EL) regions are marked in yellow. PSC threshold temperatures for NAT (195 K) and ice (188 K) and threshold temperatures +2 K (197 K, 190 K) are marked in black.

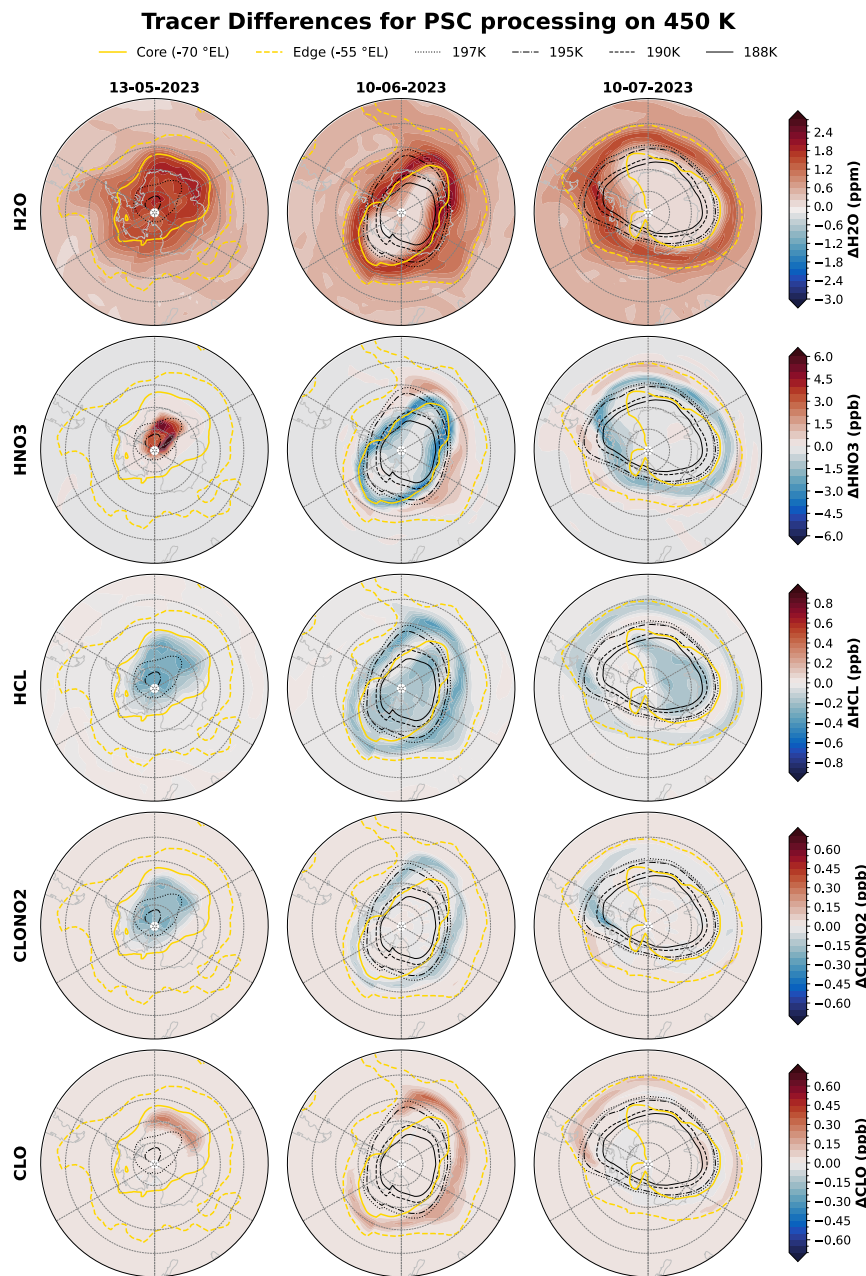

**Figure S6.** Antarctic polar projections of modelled H<sub>2</sub>O, HNO<sub>3</sub>, HCl, ClONO<sub>2</sub> and ClO on the 450 K level for 3 days (13.05.23, 10.06.23, 10.07.23) to show the evolution of the PSC chemical processing. Core (−90° to −70°EL) and edge (−70° to −55° EL) regions are marked in yellow. PSC threshold temperatures for NAT (195 K) and ice (188 K) and threshold temperatures +2 K (197 K, 190 K) are marked in black.
